# Supplementary material for: Giant electrical energy storage density in the P(VDF-TrFE)–graphene oxide composite papers with quasi-two-dimensional ferroelectricity
Source: Springer Nature journal article supplement (doi:10.1007/s10854-019-01089-3), 2019-03-13
Supplement: MOESM1 [file 16545272]

## (Supporting Information)

## **Giant electrical energy storage density in the graphene oxide-P(VDF-TrFE) composite papers with quasi-two-dimensional ferroelectricity**

## S. Ullaha, Z. Hana, Guangping Zhenga,*

## a Department of Mechanical Engineering, The Hong Kong Polytechnic University,

## Hung Hom, Kowloon, Hong Kong, China

*Corresponding Address: mmzheng@polyu.edu.hk


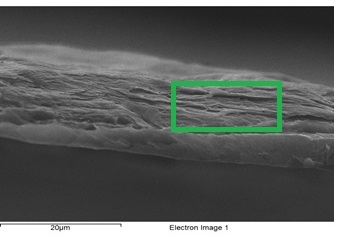


| Element | Weight% | Atomic% |  |
| --- | --- | --- | --- |
|  |  |  |  |
| C K | 50.72 | 58.69 |  |
| O K | 38.37 | 33.33 |  |
| F K | 10.91 | 7.98 |  |
|  |  |  |  |
| Totals | 100.00 |  |  |


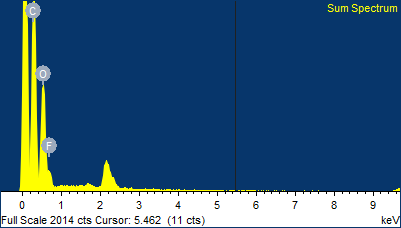


Figure 1S. EDX of the GO/P(VDF-TrFE)-10% nanocomposite paper.


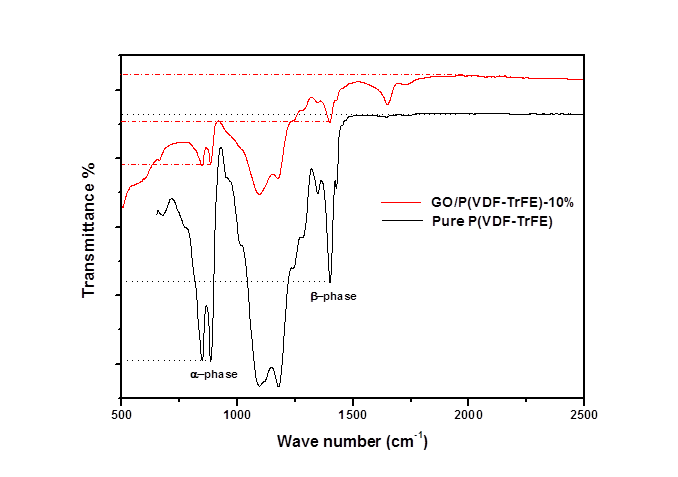


Figure 2S. Comparison of intensities of the β-phase of pure P(VDF-TrFE) and the nanocomposites, in relative to those of the α-phase, respectively.


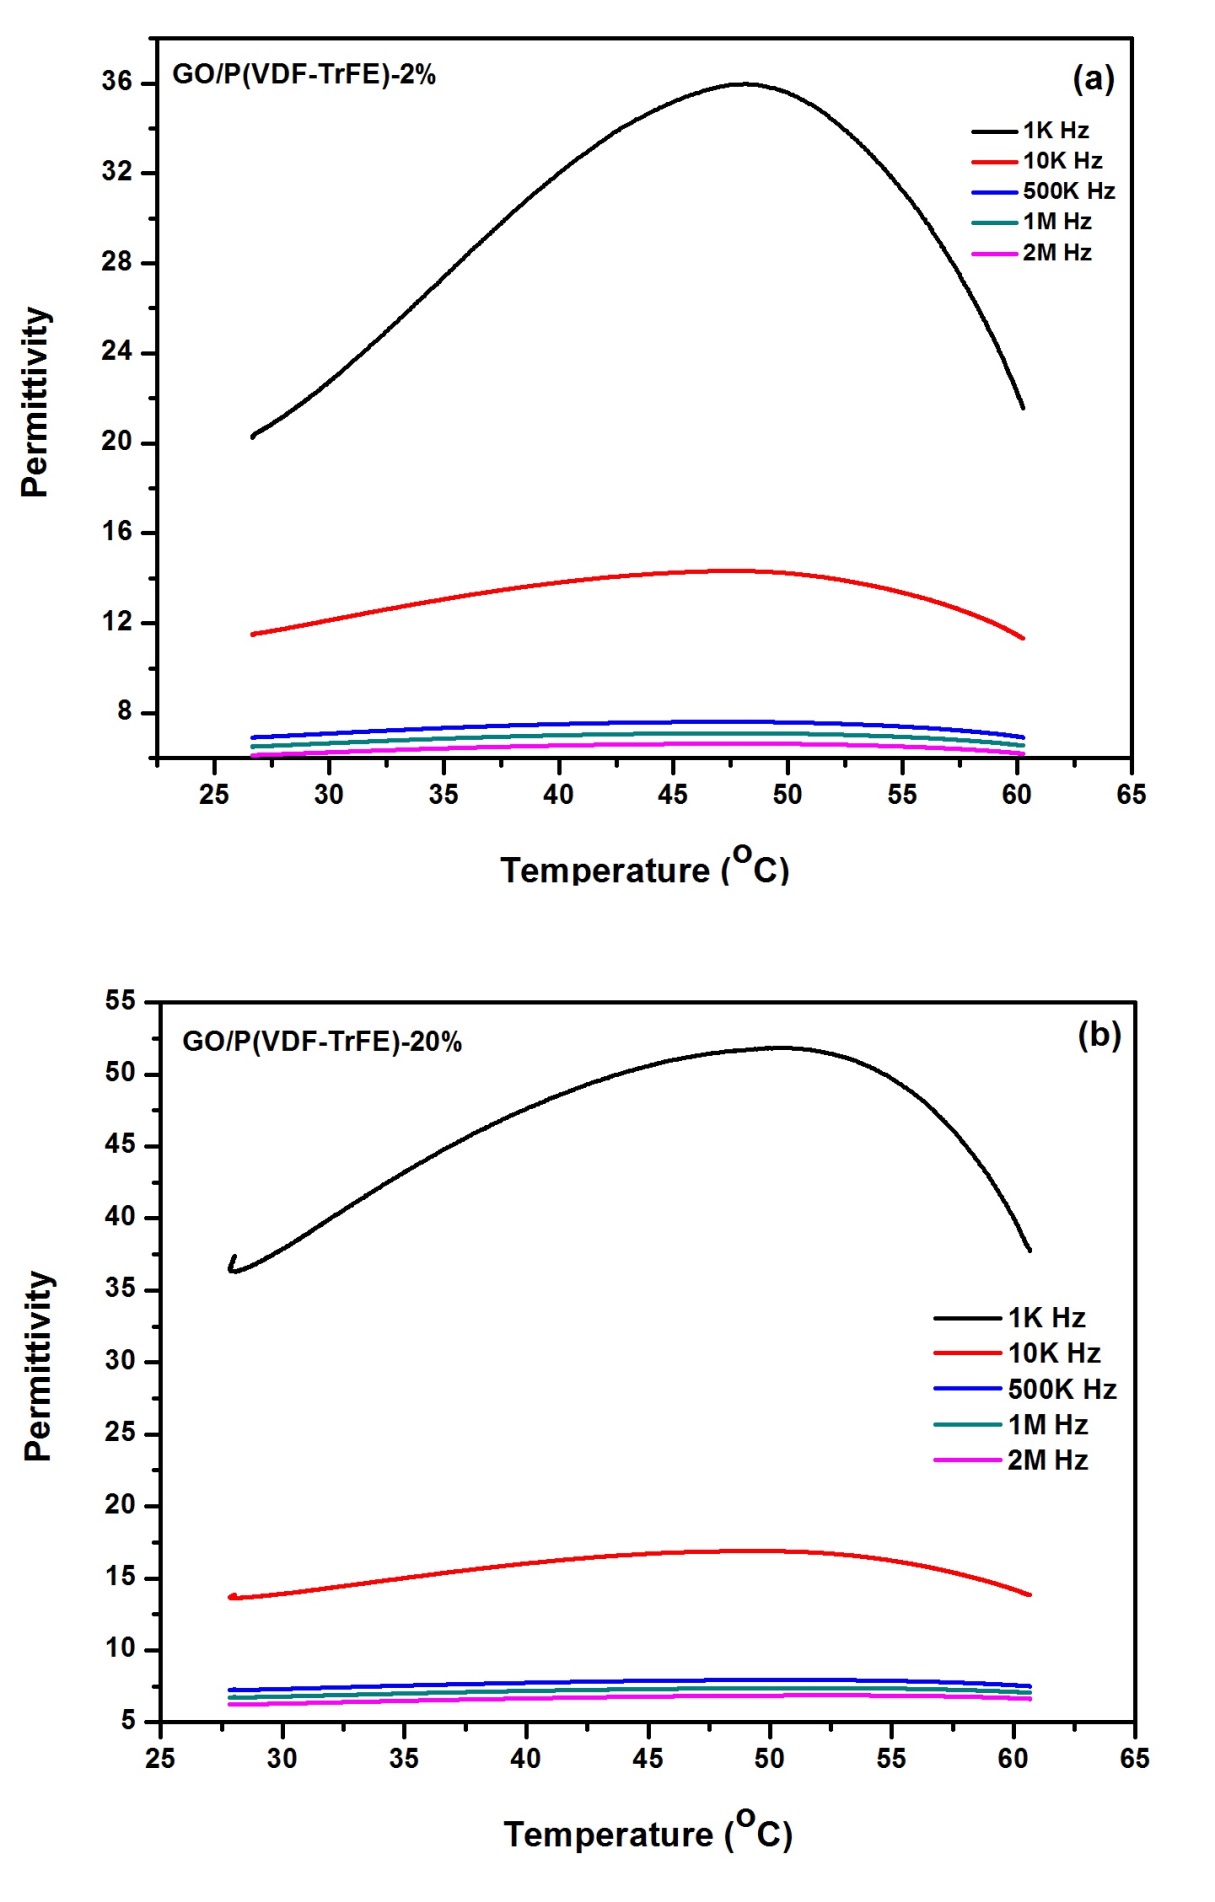
Figure 3S. a) Dielectric spectra of GO/P(VDF-TrFE)-2%, (b) Dielectric spectra of GO/P(VDF-TrFE)-20%.

**
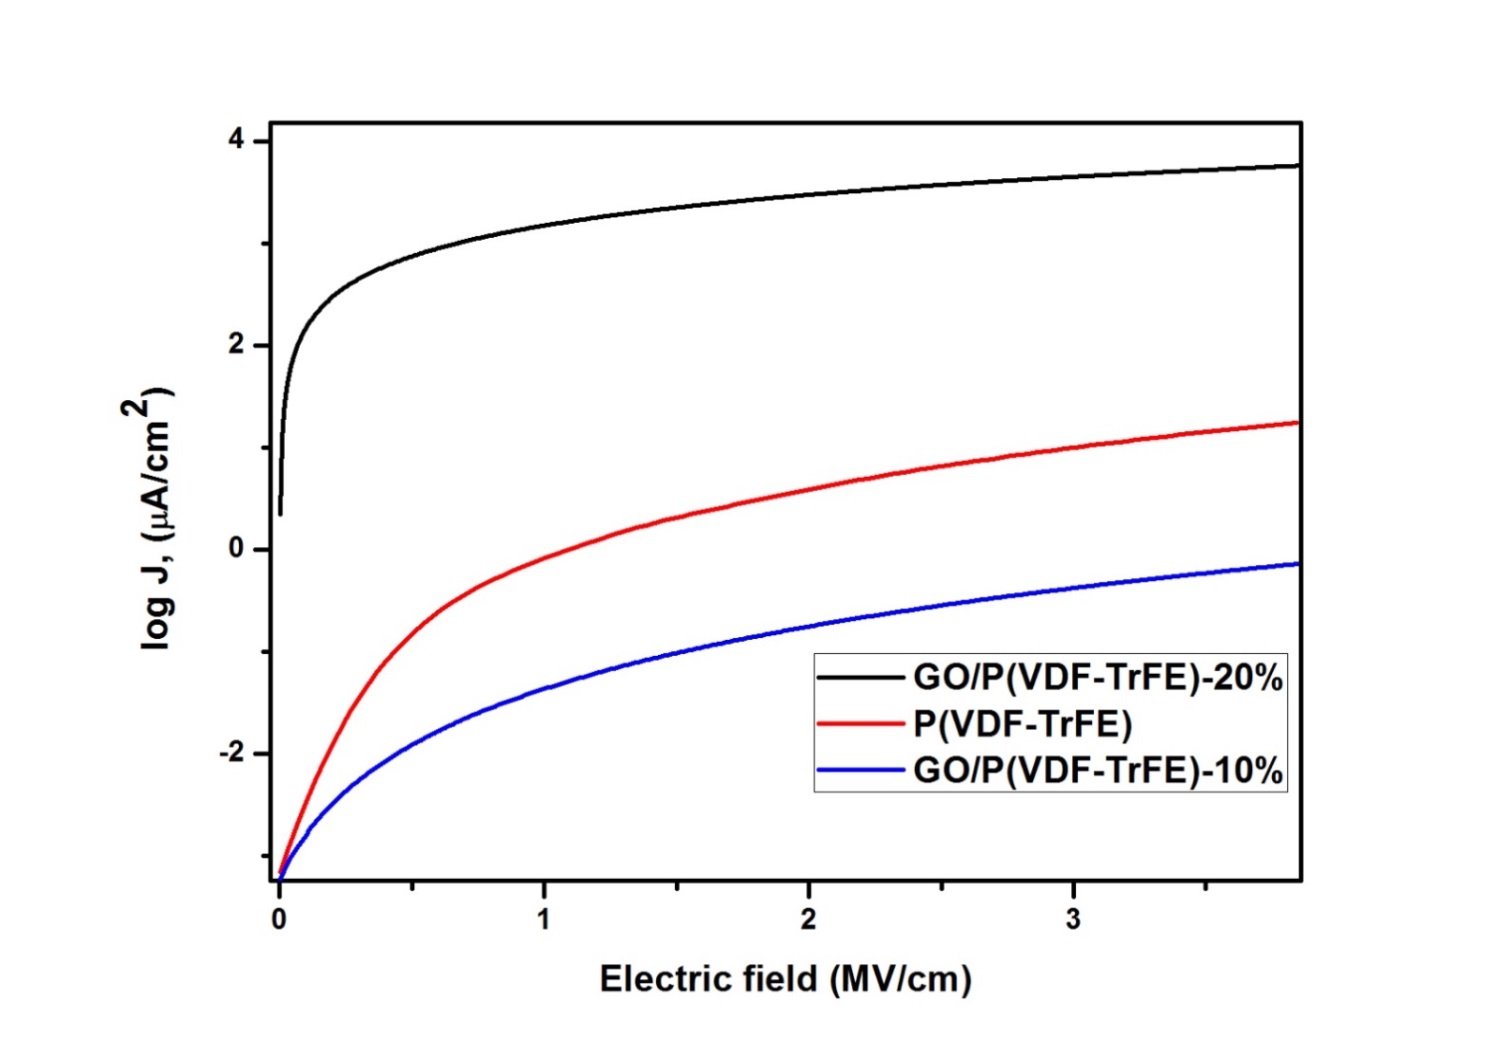
**Figure 4S. Leakage current density of the P(VDF-TrFE) and GO/P(VDF-TrFE) nanocomposites.
